# Supplementary material
Source: publisher figshare collection journal article supplement (https://tandf.figshare.com/ndownloader/files/14257406)
Supplement: Supplementary file 1 [file 14257406]

## Supplementary materials

# Two New Bioactive Lignans From Leaves and Twigs of *Cleistanthus concinnus* croizat

Shi-rui Fan <sup>a,b</sup>, Jing-jing Guo <sup>a</sup>, Yi-ting Wang <sup>b</sup>, Bi-juan Yang <sup>a</sup>, Duo-zhi Chen <sup>a\*</sup> and Xiao-jiang Hao <sup>a\*</sup>

<sup>a</sup> State Key Laboratory of Phytochemistry and Plant Resources in West China, Kunming Institute of Botany, Chinese Academy of Sciences, Kunming 650201, Yunnan, PR China

<sup>b</sup> Department of Chemical Science and Engineering, Yunnan University, Kunming 650091, Yunnan, PR China

## ABSTRACT

Two new lignans (**1-2**), along with five known compounds (**3-7**) with different structures were isolated from leaves and twigs of *Cleistanthus concinnus* croizat. The new lignans were elucidated as (7'R,8'S)-3,3',5'-trimethoxy-4,4'-dihydroxy-7-en-7',9'-epoxy-8,8'-lignan (**1**) and (7'R,8'S)-3,3'-dimethoxy-4,4'-dihydroxy-7-en-7',9'-epoxy-8,8'-lignan (**2**) by comprehensive spectroscopic analysis including 1D and 2D NMR as well as HREIMS and comparing their NMR data with known compounds in the literature. Among these isolated compounds, compound **1**, **2**, **3**, and **6** were tested for anti-inflammatory effects by inhibiting NO production in lipopolysaccharide (LPS)-stimulated RAW 264.7 cells.

---

\*Corresponding authors.

E-mail addresses: Xiao-Jiang Hao, haoxj@mail.kib.ac.cn; Duo-Zhi Chen, chenduozi@mail.kib.ac.cn,

## Contents

Figure S1.  $^1\text{H}$  NMR (500 MHz) spectrum of compound **1** in  $\text{CDCl}_3$ .

Figure S2.  $^{13}\text{C}$  NMR (125 MHz) spectrum of compound **1** in  $\text{CDCl}_3$ .

Figure S3. HSQC spectrum of compound **1** in  $\text{CDCl}_3$ .

Figure S4.  $^1\text{H}$ - $^1\text{H}$  COSY spectrum of compound **1** in  $\text{CDCl}_3$ .

Figure S5. HMBC spectrum of compound **1** in  $\text{CDCl}_3$ .

Figure S6. ROESY spectrum of compound **1** in  $\text{CDCl}_3$ .

Figure S7. HRESI(+)MS spectrum of compound **1**.

Figure S8. UV spectrum of compound **1**.

Figure S9. IR spectrum of compound **1**.

Figure S10.  $^1\text{H}$  NMR (500 MHz) spectrum of compound **2** in  $\text{CDCl}_3$ .

Figure S11.  $^{13}\text{C}$  NMR (125 MHz) spectrum of compound **2** in  $\text{CDCl}_3$ .

Figure S12. HSQC spectrum of compound **2** in  $\text{CDCl}_3$ .

Figure S13.  $^1\text{H}$ - $^1\text{H}$  COSY spectrum of compound **2** in  $\text{CDCl}_3$ .

Figure S14. HMBC spectrum of compound **2** in  $\text{CDCl}_3$ .

Figure S15. ROESY spectrum of compound **2** in  $\text{CDCl}_3$ .

Figure S16. HRESI(+)MS spectrum of compound **2**.

Figure S17. UV spectrum of compound **2**.

Figure S18. IR spectrum of compound **2**.

Figure S19. Key  $^1\text{H}$ - $^1\text{H}$  COSY, HMBC and ROESY correlations of compound **1** and compound **2**.

Table S1.  $^1\text{H}$  (500 MHz) and  $^{13}\text{C}$  (125 MHz) NMR data of compound **1-2** in  $\text{CDCl}_3$ .

Table S2. Inhibitory effects on NO production in LPS-stimulated RAW264.7 cells.

Table S3.  $\text{IC}_{50}$  of Inhibitory effects on NO production of **1**, **2**, and **6**

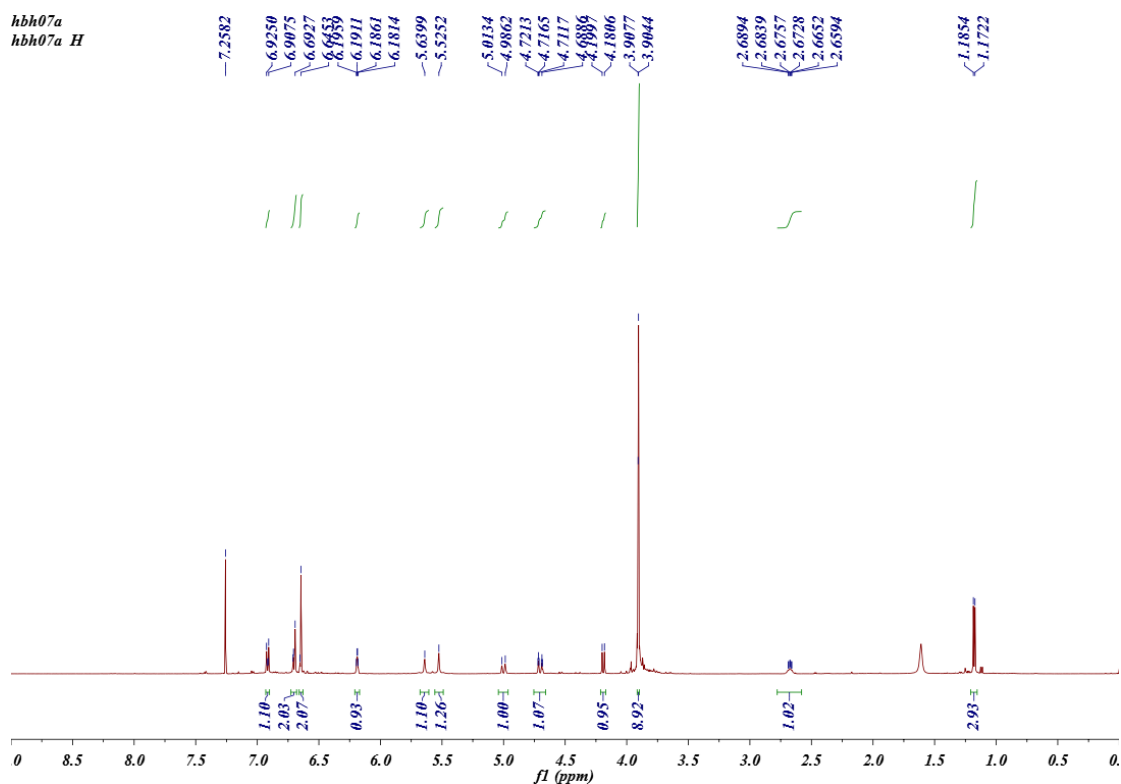

Figure S1.  $^1\text{H}$  NMR (500 MHz) spectrum of compound **1** in  $\text{CDCl}_3$ .

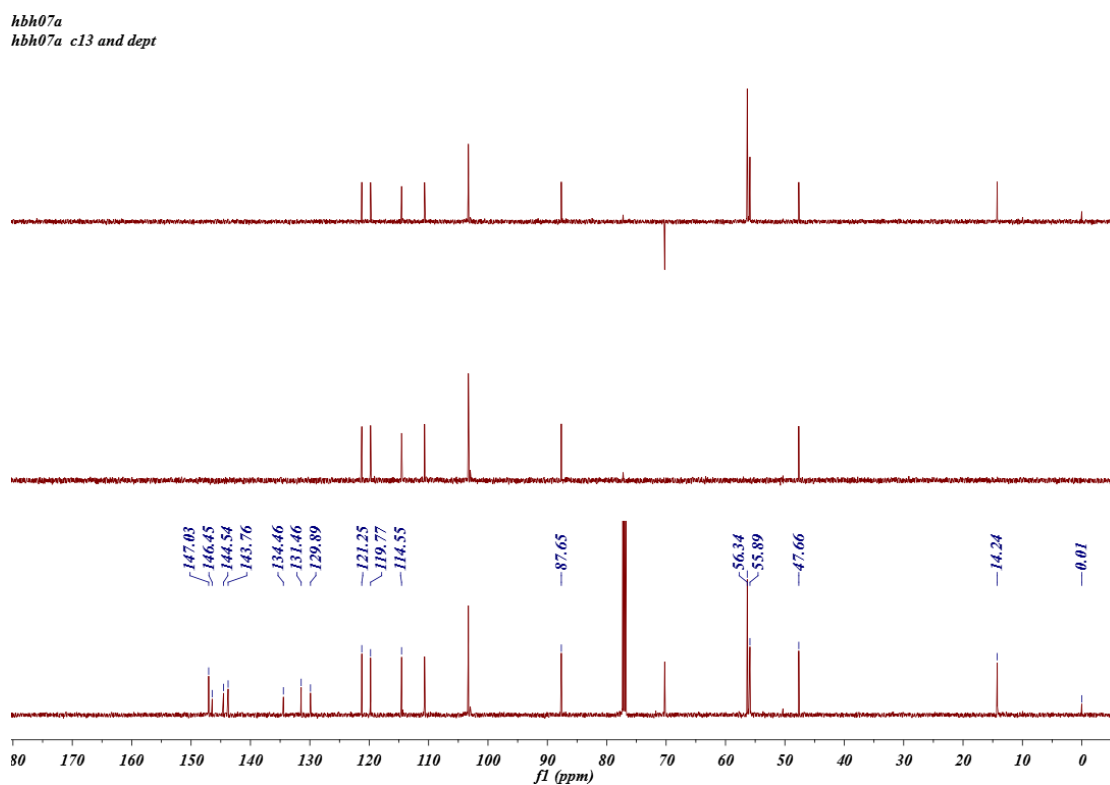

Figure S2.  $^{13}\text{C}$  NMR and DEPT (125 MHz) spectrum of compound **1** in  $\text{CDCl}_3$ .

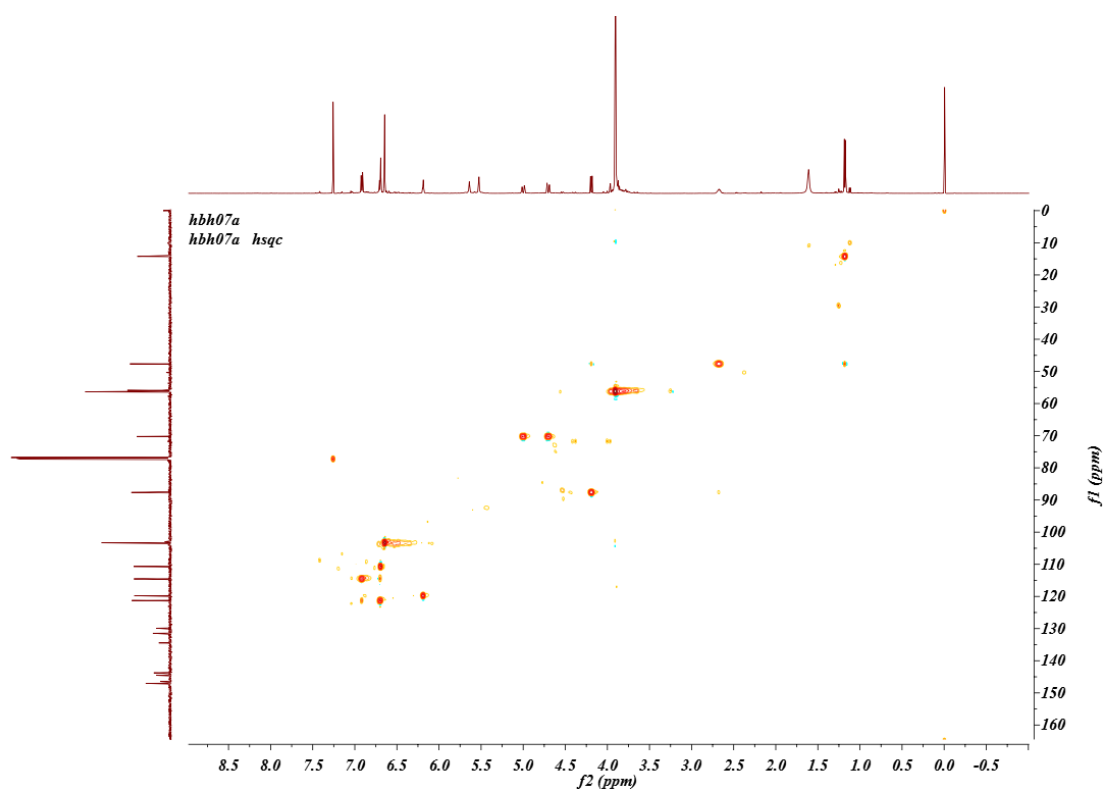

Figure S3. HSQC spectrum of compound **1** in CDCl<sub>3</sub>.

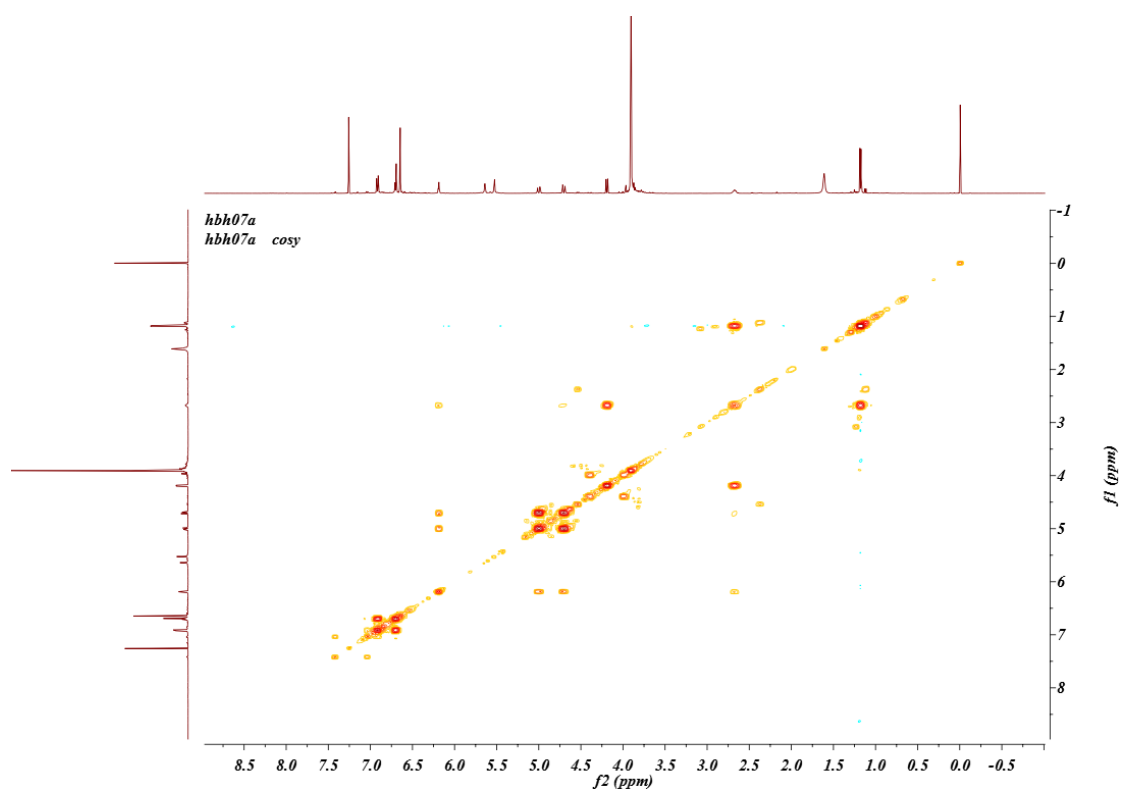

Figure S4. <sup>1</sup>H-<sup>1</sup>H COSY spectrum of compound **1** in CDCl<sub>3</sub>.

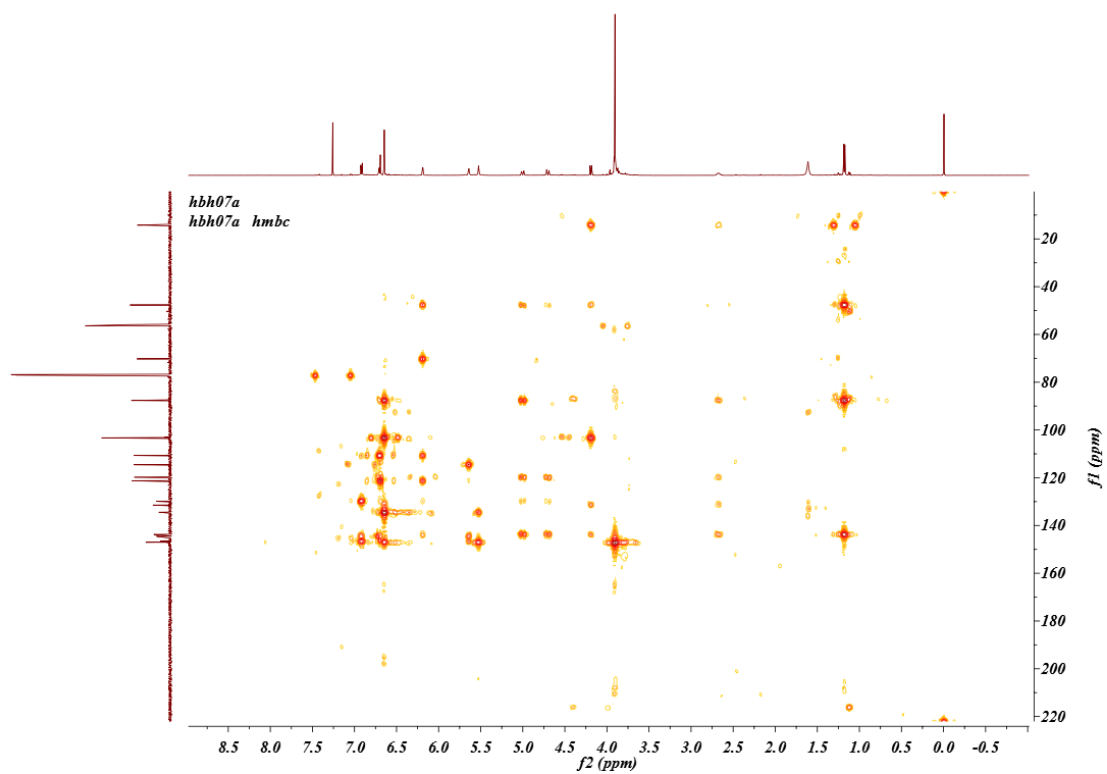

Figure S5. HMBC spectrum of compound **1** in CDCl<sub>3</sub>.

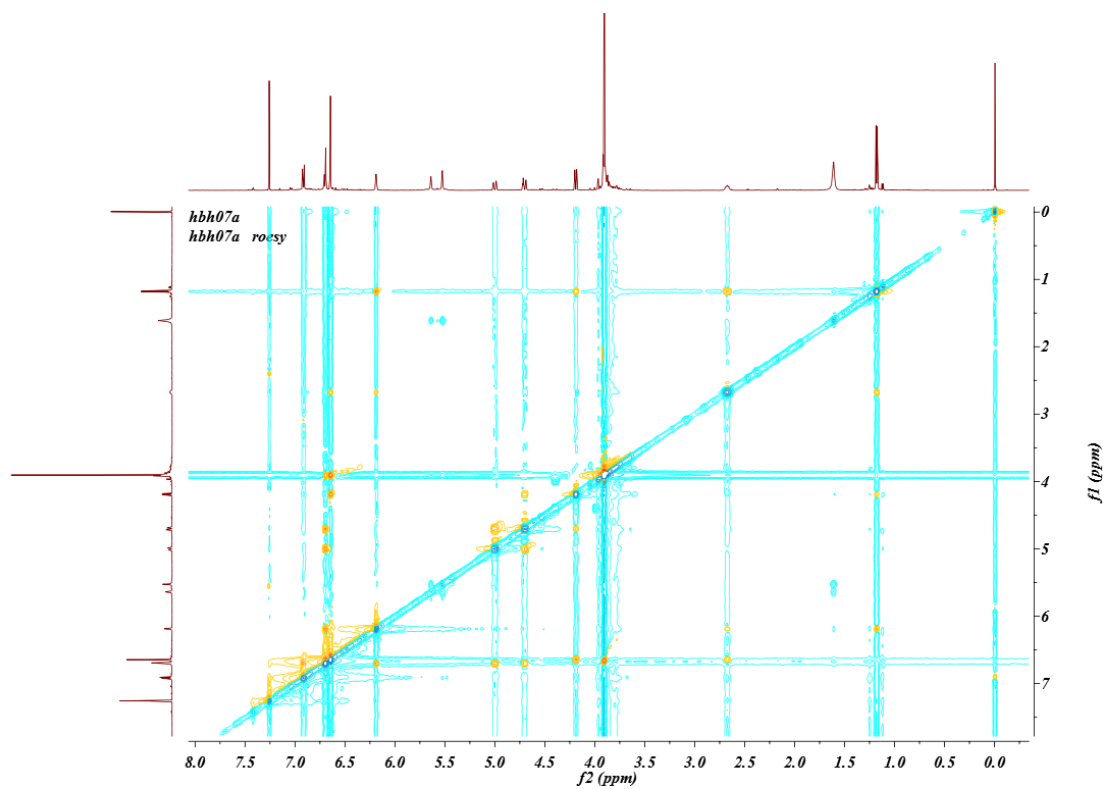

Figure S6. ROESY spectrum of compound **1** in CDCl<sub>3</sub>.

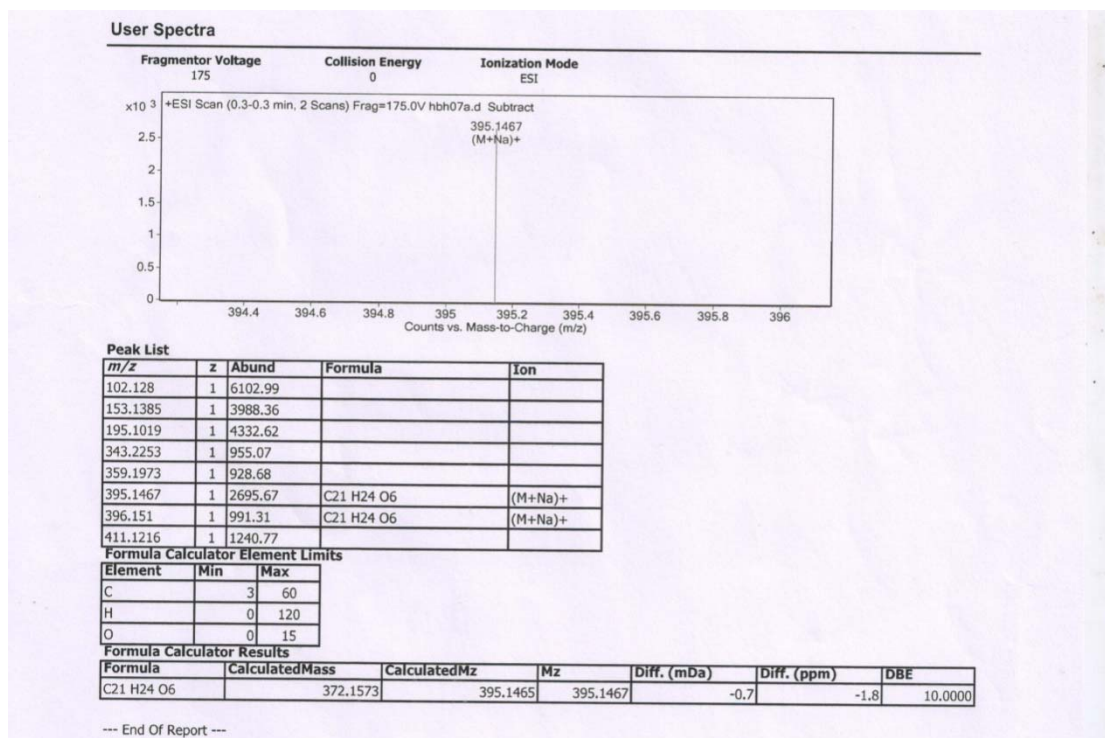

Figure S7. HRESI(+)MS spectrum of compound **1**.

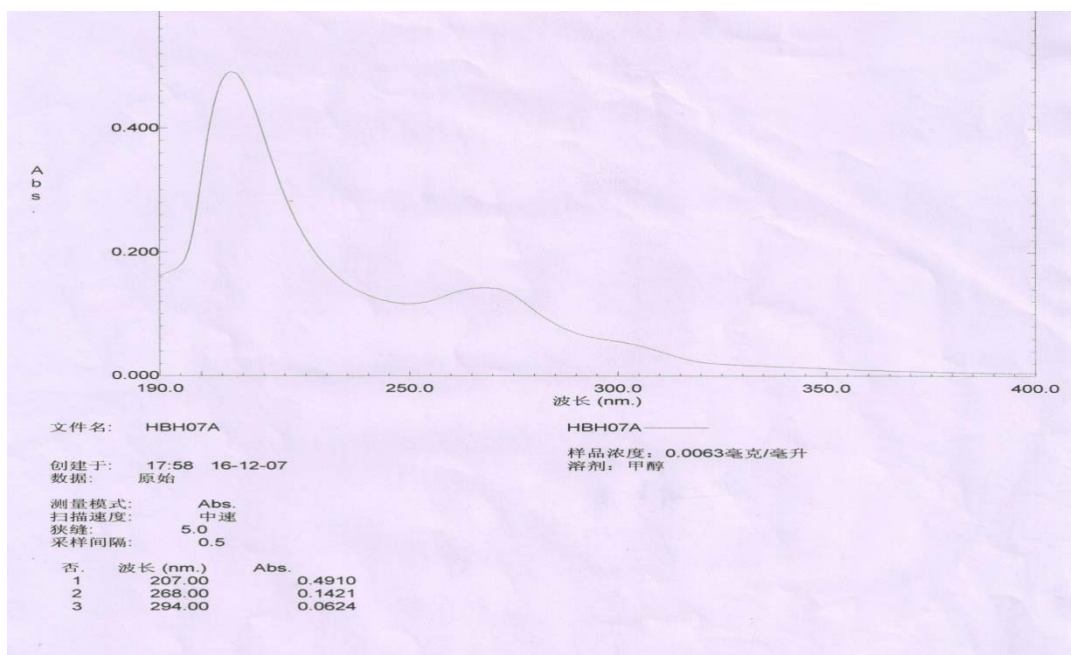

Figure S8. UV spectrum of compound **1**.

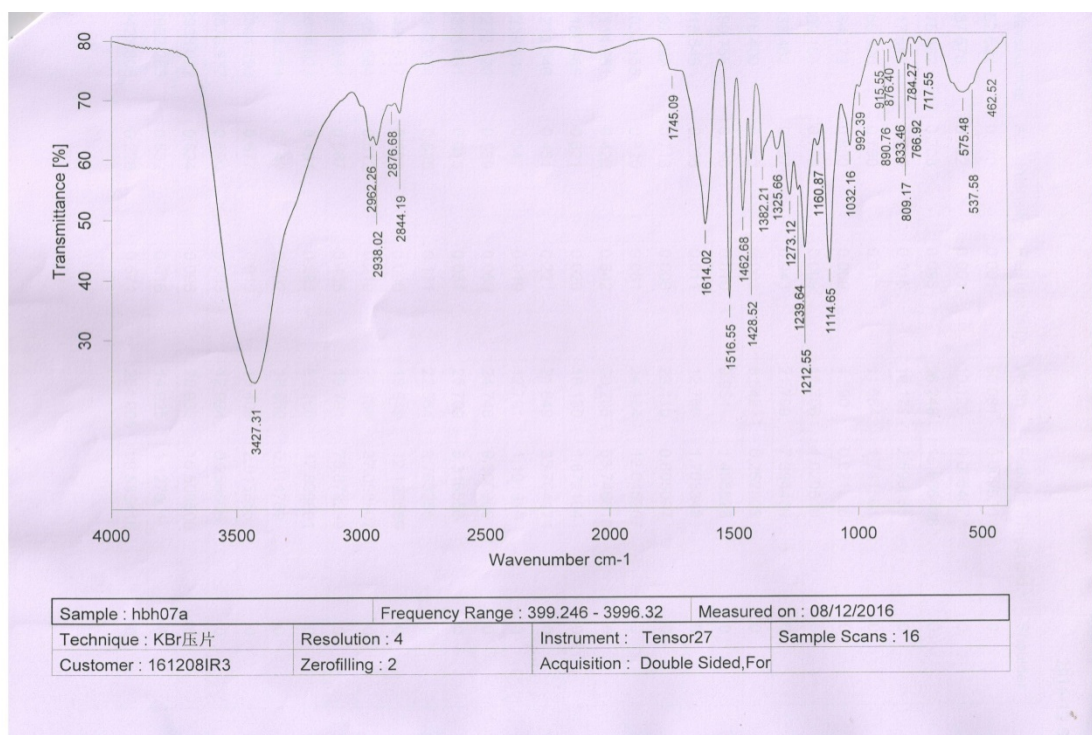

Figure S9. IR spectrum of compound **1**.

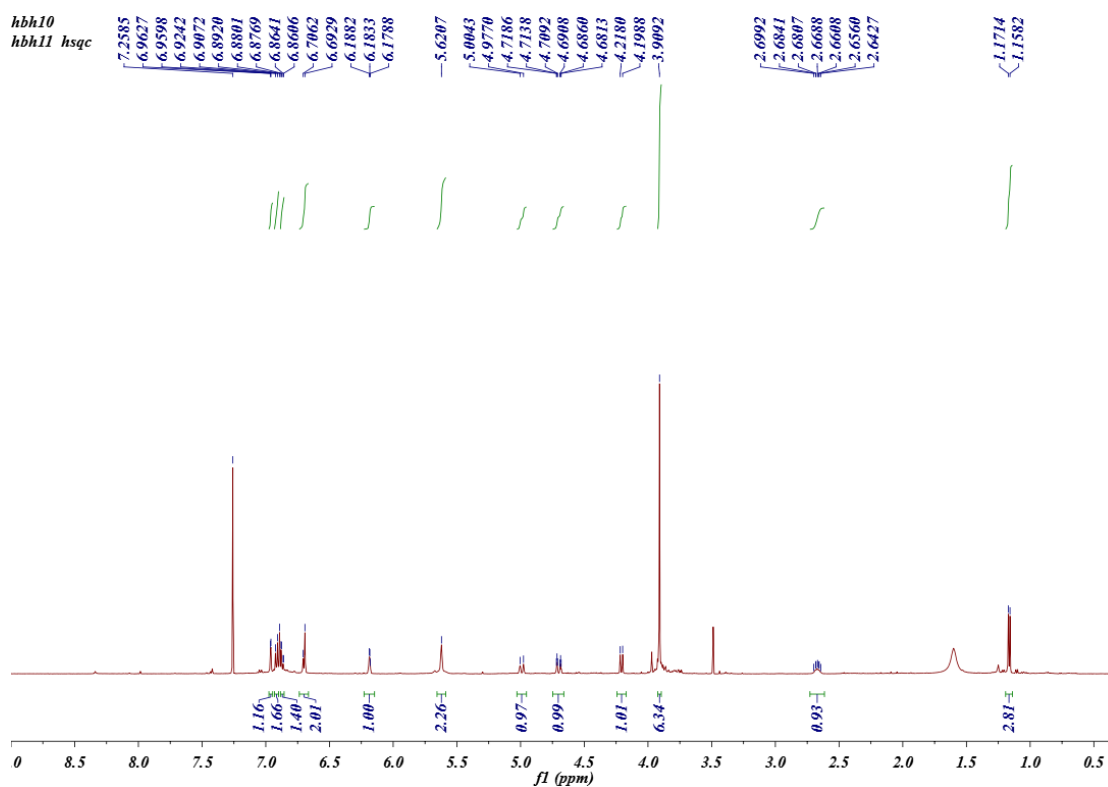

Figure S10. <sup>1</sup>H NMR (500 MHz) spectrum of compound **2** in CDCl<sub>3</sub>.

hbb10  
hbb10 c13 and dept

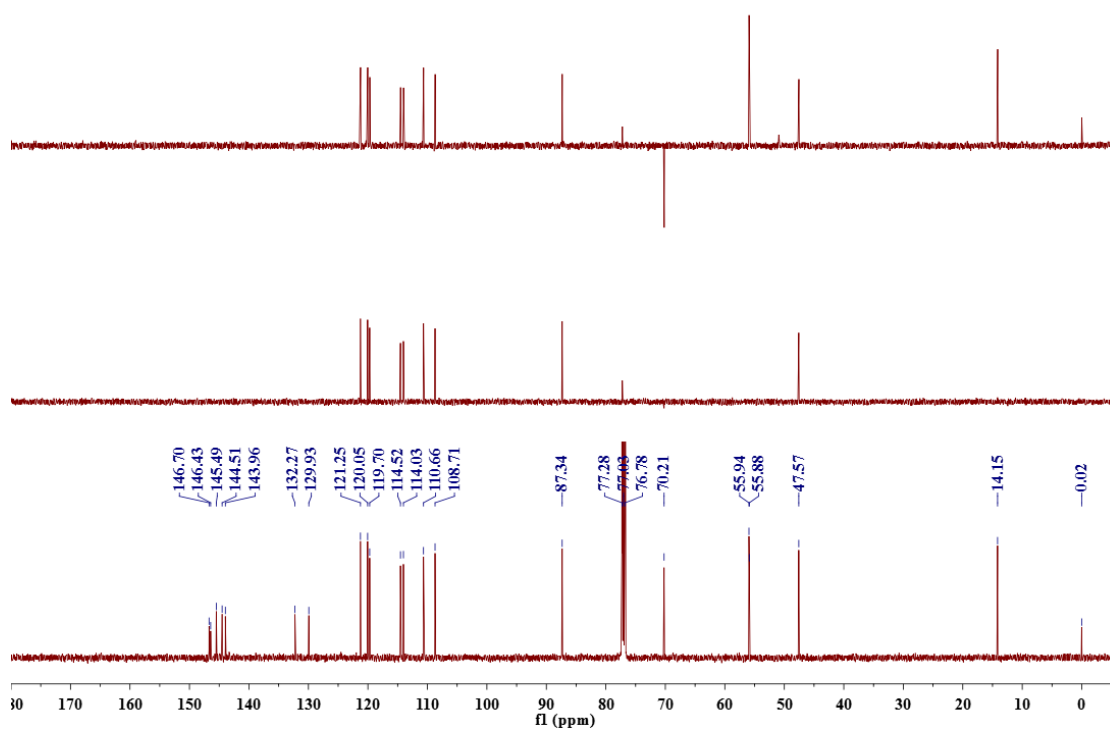

Figure S11.  $^{13}\text{C}$  NMR and DEPT (125 MHz) spectrum of compound **2** in  $\text{CDCl}_3$ .

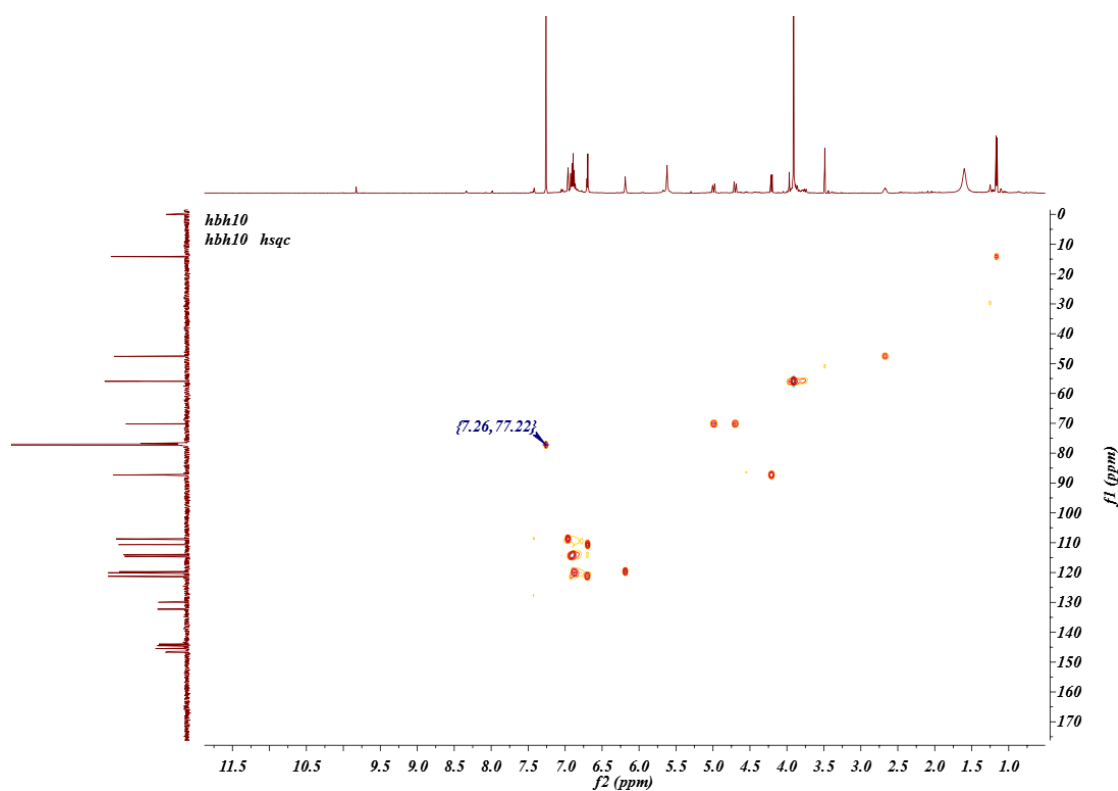

Figure S12. HSQC spectrum of compound **2** in  $\text{CDCl}_3$ .



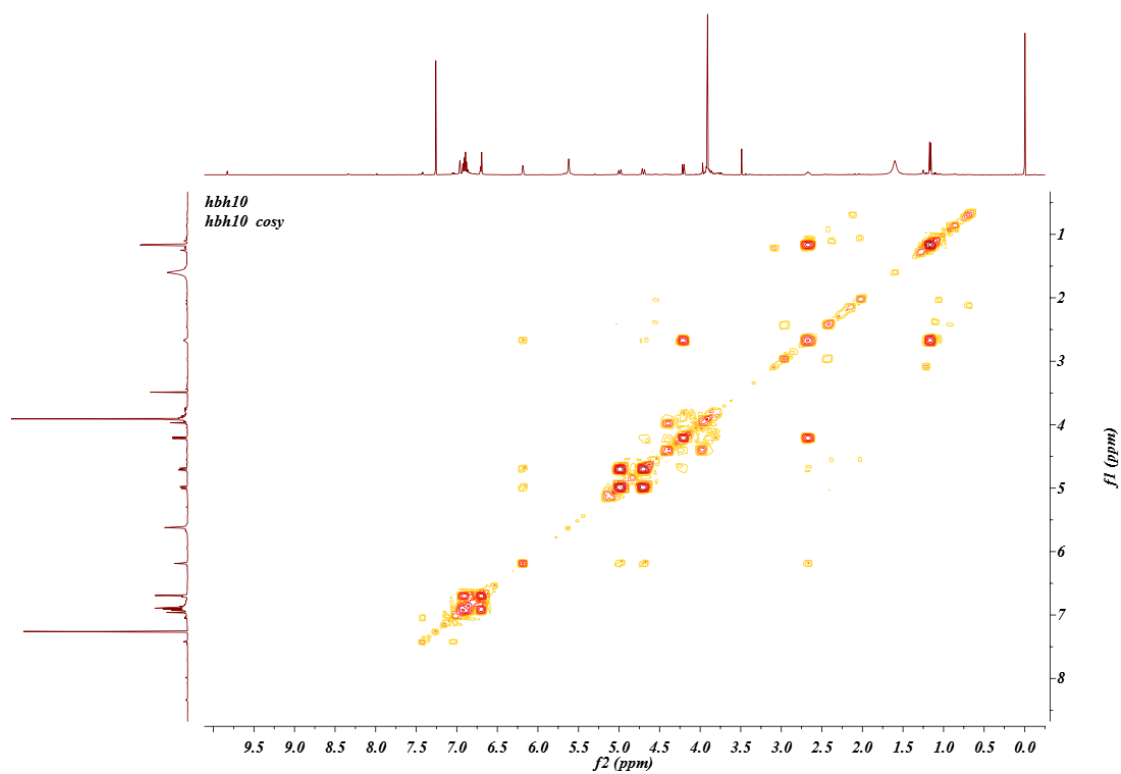

Figure S13.  $^1\text{H}$ - $^1\text{H}$  COSY spectrum of compound **2** in  $\text{CDCl}_3$ .

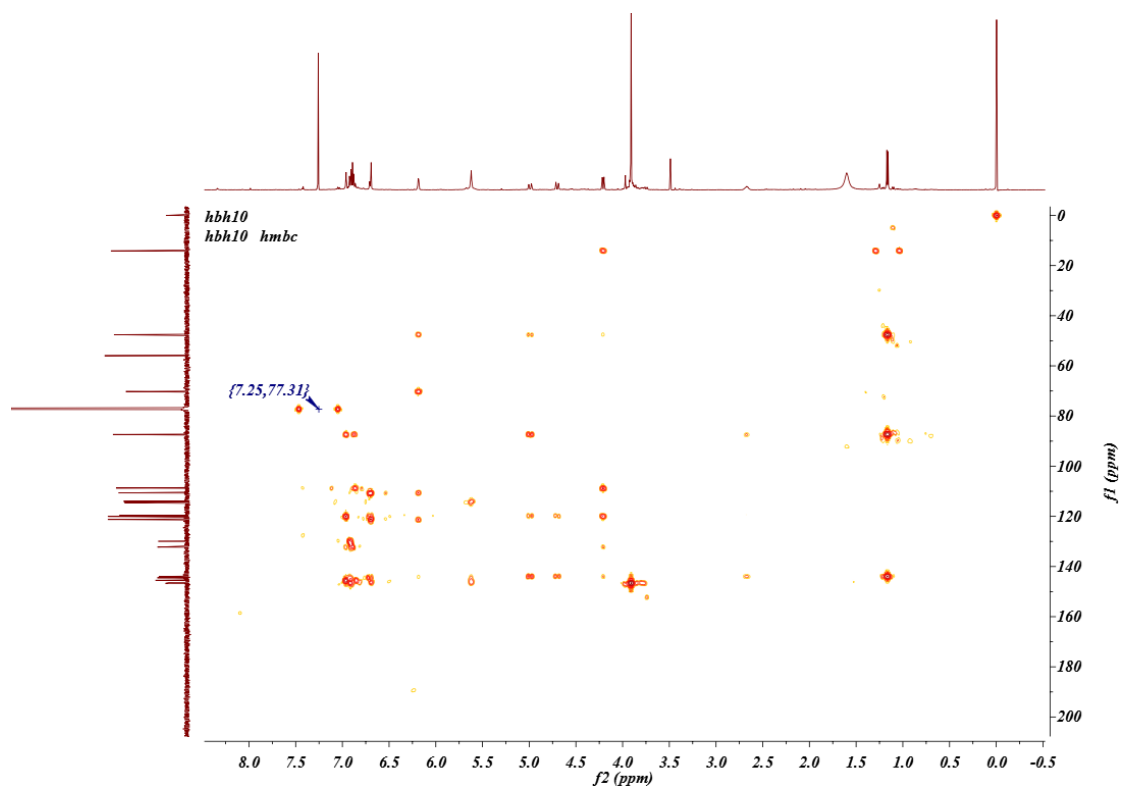

Figure S14. HMBC spectrum of compound **2** in  $\text{CDCl}_3$ .

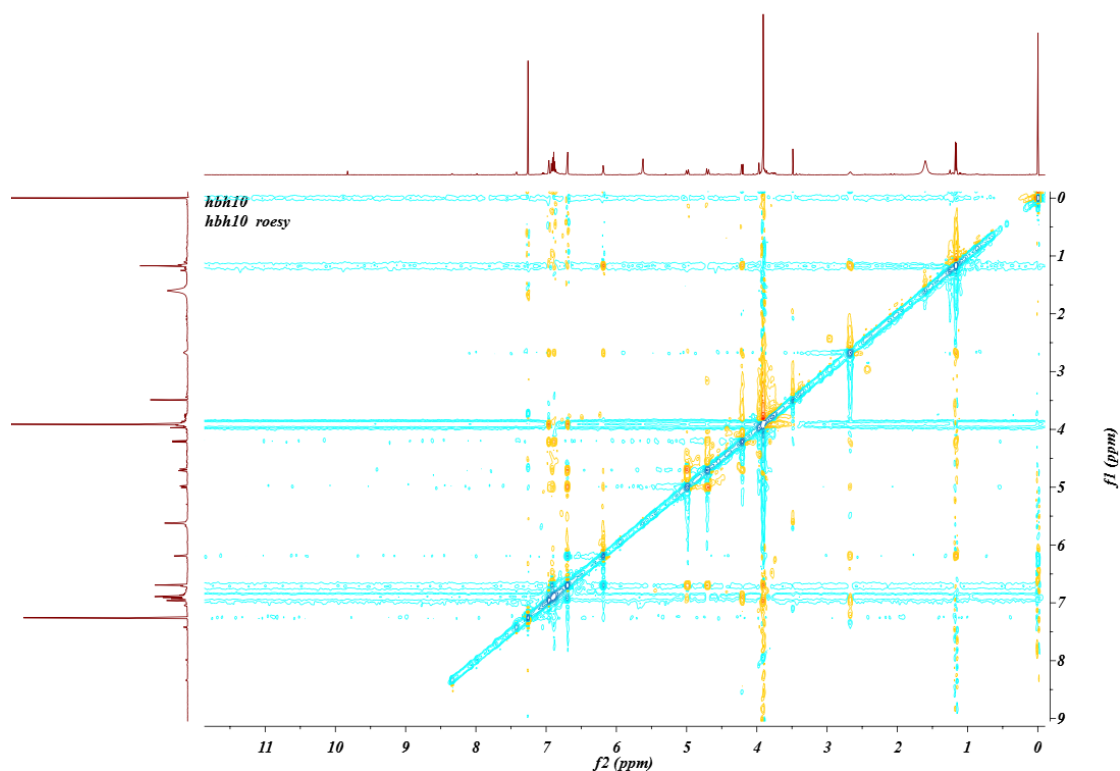

Figure S15. ROESY spectrum of compound **2** in CDCl<sub>3</sub>.

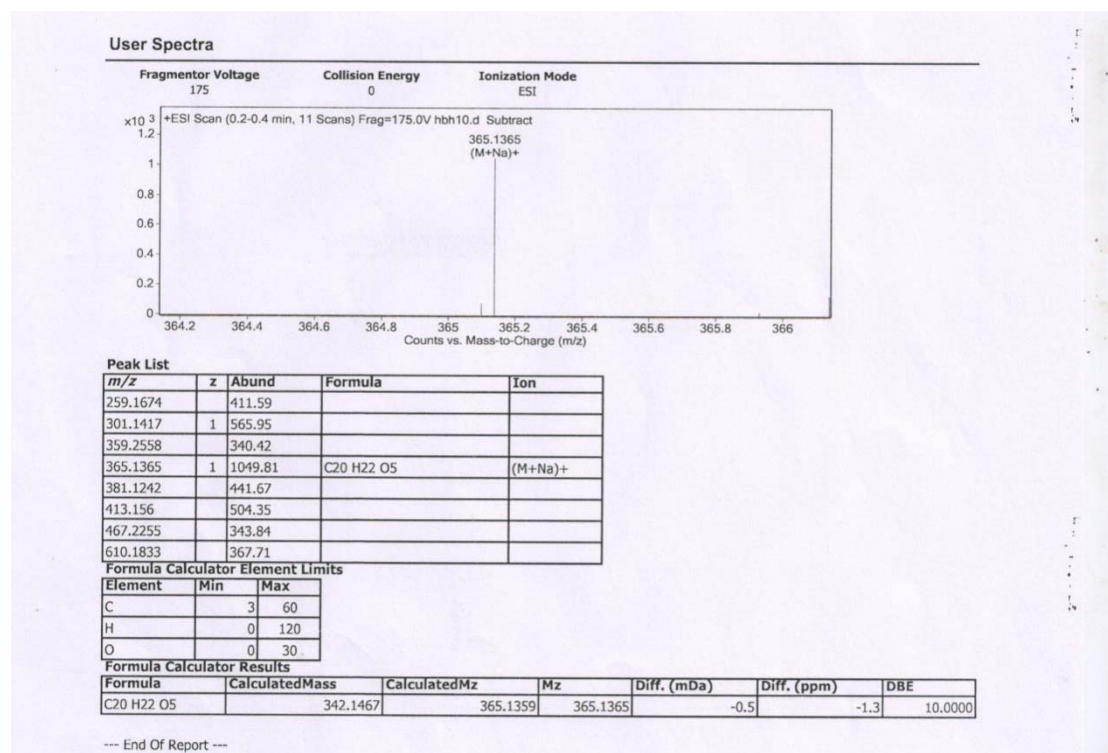

Figure S16. HRESI(+)-MS spectrum of compound **2**.

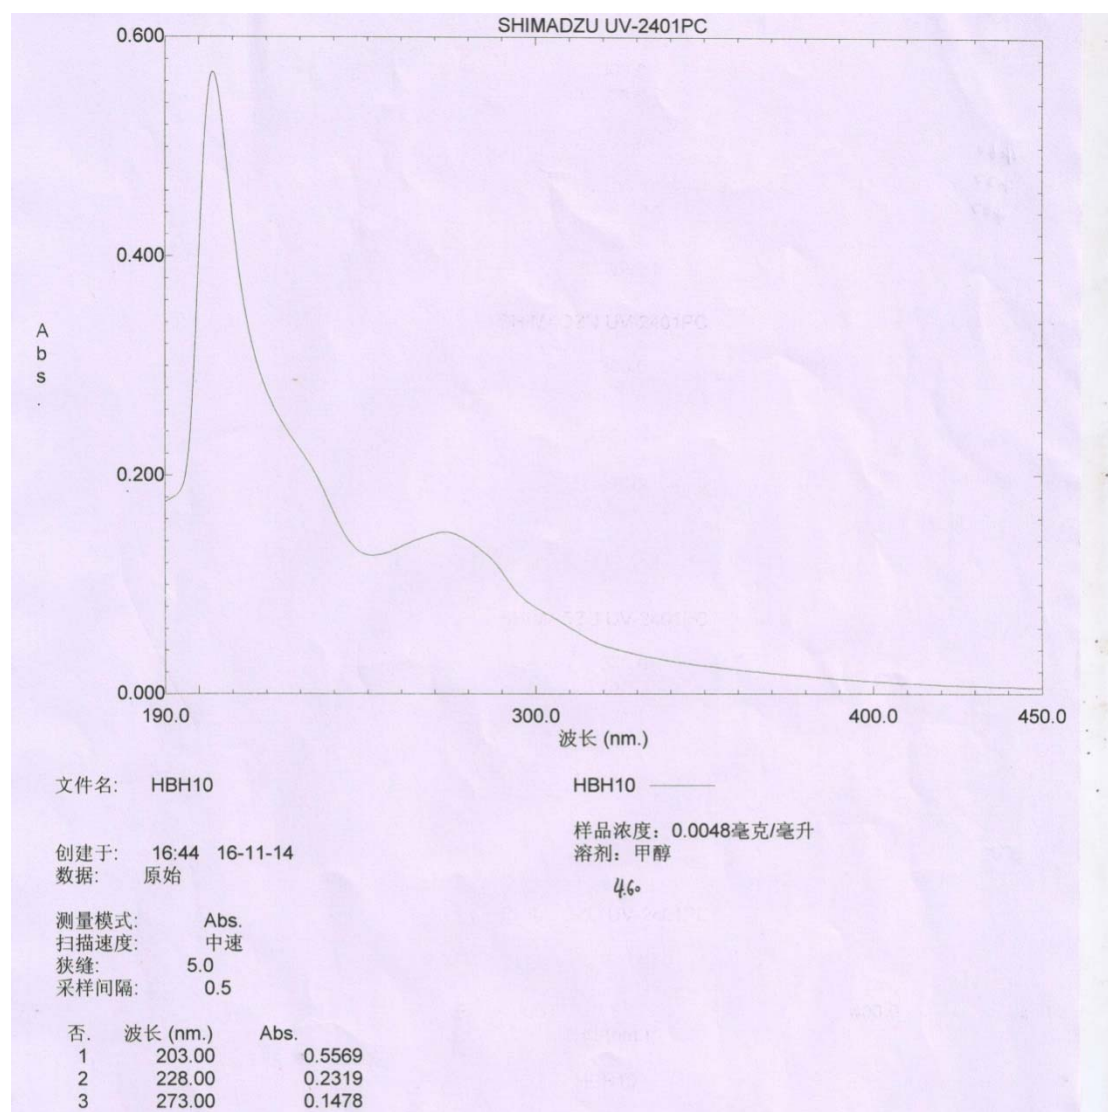

Figure S17. UV spectrum of compound2.

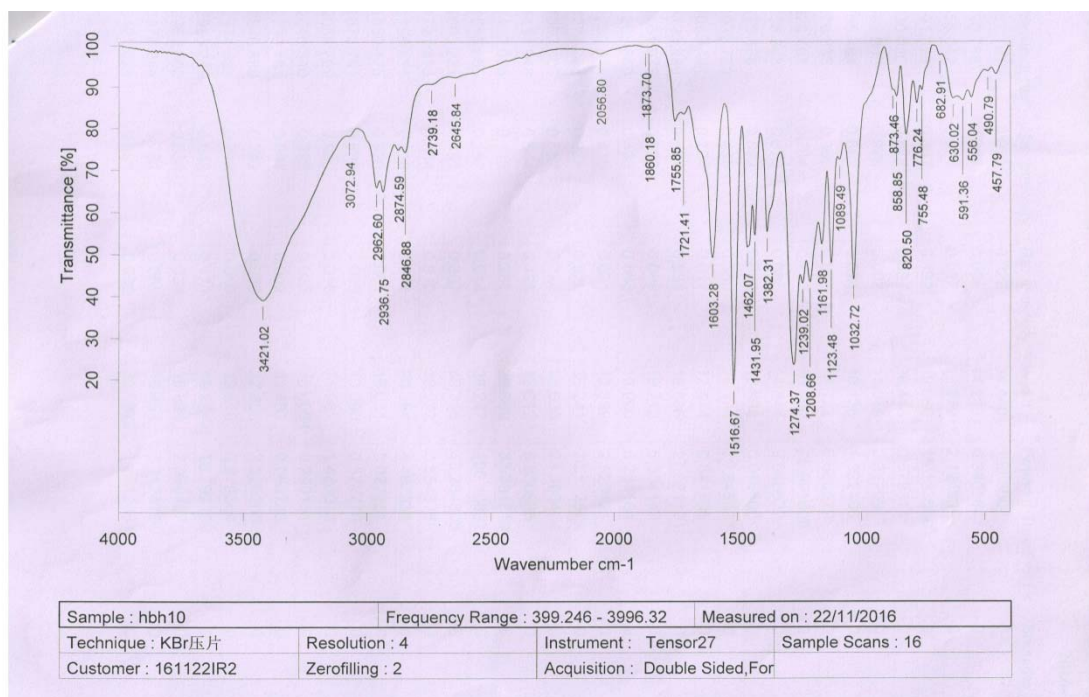

Figure S18. IR spectrum of compound **2**.

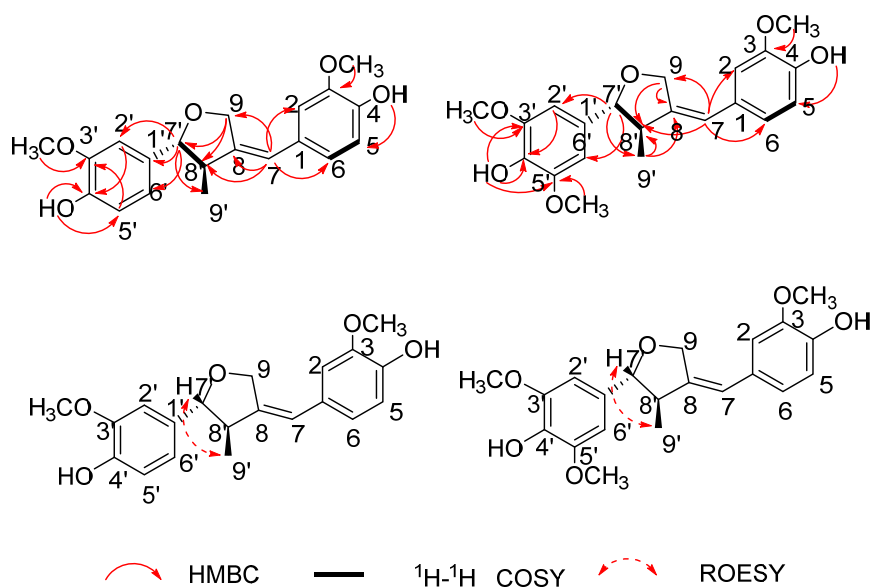

Figure S19. Key  $^1\text{H}$ - $^1\text{H}$  COSY, HMBC and ROESY correlations of compound **1** and compound **2**.

Table S1. <sup>1</sup>H (500 MHz) and <sup>13</sup>C (125 MHz) NMR data of compound **1-2** in CDCl<sub>3</sub>.

| <b>1</b>            |                     |                     | <b>2</b>            |                     |
|---------------------|---------------------|---------------------|---------------------|---------------------|
| No.                 | $\delta_{\text{H}}$ | $\delta_{\text{C}}$ | $\delta_{\text{H}}$ | $\delta_{\text{C}}$ |
| 1                   |                     | 129.9               |                     | 129.9               |
| 2                   | 6.7 (d, 1.8)        | 110.7               | 6.69 (d, 1.8)       | 110.7               |
| 3                   |                     | 144.5               |                     | 144.5               |
| 4                   |                     | 146.5               |                     | 146.4               |
| 5                   | 6.92 (d, 8.8)       | 114.6               | 6.90 (d, 8.4)       | 114.0               |
| 6                   | 6.7 <sup>a</sup>    | 121.3               | 6.7 <sup>a</sup>    | 121.3               |
| 7                   | 6.19 (m)            | 119.8               | 6.19 (m)            | 119.7               |
| 8                   |                     | 143.8               |                     | 144.0               |
| 9                   | 5.00 (m), 4.7 (m)   | 70.2                | 4.99 (m), 4.7 (m)   | 70.2                |
| 1'                  |                     | 131.5               |                     | 132.3               |
| 2'                  | 6.65 (s)            | 103.3               | 6.96 (d, 1.5)       | 108.7               |
| 3'                  |                     | 147.0               |                     | 146.7               |
| 4'                  |                     | 134.5               |                     | 145.5               |
| 5'                  |                     | 147.0               | 6.90 (d, 8.4)       | 114.5               |
| 6'                  | 6.65 (s)            | 103.3               | 6.87 (dd, 8.4, 1.5) | 120.0               |
| 7'                  | 4.19 (d, 9.6)       | 87.6                | 4.21 (d, 9.6)       | 87.3                |
| 8'                  | 2.68 (m)            | 47.7                | 2.67 (m)            | 47.6                |
| 9'                  | 1.18 (d, 6.6)       | 14.2                | 1.17 (d, 6.6)       | 14.2                |
| 4-OH                | 5.64 (brs)          |                     | 5.62 (brs)          |                     |
| 4'-OH               | 5.53 (brs)          |                     | 5.62 (brs)          |                     |
| 3-OCH <sub>3</sub>  | 3.91 (s)            | 55.9                | 3.91 (s)            | 55.9                |
| 3'-OCH <sub>3</sub> | 3.90 (s)            | 56.3                | 3.91 (s)            | 55.9                |
| 5'-OCH <sub>3</sub> | 3.90 (s)            | 56.3                |                     |                     |

<sup>[a]</sup>Overlapped signals are reported without designating multiplicity.

Table S2. Inhibitory effects on NO production in LPS-stimulated RAW 264.7 cells.

| Compound            | Concentration ( $\mu\text{M}$ ) | NO inhibition rate(%) |
|---------------------|---------------------------------|-----------------------|
| L-NMMA <sup>a</sup> | 50                              | 54.02±0.91            |
| <b>1</b>            | 25                              | 39.85±1.34            |
| <b>2</b>            | 25                              | 25.18±4.46            |
| <b>3</b>            | 25                              | -0.47±0.82            |
| <b>6</b>            | 25                              | 28.65±1.93            |

<sup>a</sup>L-NMMA (NG-monomethyl-L-arginine): positive control.

Table S3. IC<sub>50</sub> of Inhibitory effects on NO production of **1**, **2**, and **6**

| Compounds | IC <sub>50</sub> (μM) |     |
|-----------|-----------------------|-----|
|           | Mean                  | SD  |
| <b>1</b>  | 45.1                  | 8.1 |
| <b>2</b>  | 53.6                  | 9.0 |
| <b>6</b>  | 62.3                  | 7.8 |
| L-NMMA    | 38.6                  | 7.6 |
